# Supplementary material for: Structure–activity relationship and binding mode studies for a series of diketo-acids as HIV integrase inhibitors by 3D-QSAR, molecular docking and molecular dynamics simulations
Source: Royal Society of Chemistry journal article supplement (doi:10.1039/c6ra00713a), 2016-01-01
Supplement: c6ra00713a1.pdf [file c6ra00713a1.pdf]

## Supplementary information

Table1. The compound structures of the training set

| Compound No. | R <sup>3</sup> | R <sup>4</sup> | R <sup>5</sup> | IC <sub>50</sub> (nM) |
|--------------|----------------|----------------|----------------|-----------------------|
| <b>1</b>     | H              | H              | H              | 66                    |
| <b>2</b>     | 2-F            | H              | H              | 175                   |
| <b>3</b>     | 3-F            | H              | H              | 62                    |
| <b>4</b>     | 3-Cl           | H              | H              | 62                    |
| <b>5</b>     | 3-Br           | H              | H              | 19                    |
| <b>6</b>     | 3-OMe          | H              | H              | 140                   |
| <b>7</b>     | 4-F            | 3-F            | H              | 21                    |
| <b>8</b>     | 4-F            | 3-Me           | H              | 86                    |
| <b>9</b>     | 4-F            | 3-Cl           | H              | 28                    |
| <b>10</b>    | 4-F            | 3-Br           | H              | 44                    |

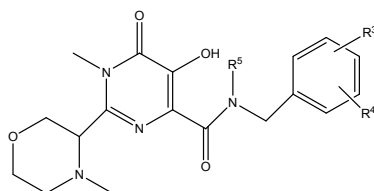

Table1 (continued)

| Compound No. | R <sup>1</sup> | R <sup>2</sup> | R <sup>3</sup> | IC <sub>50</sub> (nM) |
|--------------|----------------|----------------|----------------|-----------------------|
|              |                |                |                |                       |
| 11           | H              |                | Me             | 80                    |
| 12           | H              |                | H              | 120                   |
| 13           | H              |                | Me             | 90                    |
| 14           | H              |                | H              | 70                    |
| 15           | H              |                | Me             | 20                    |
| 16           | H              |                | H              | 40                    |
| 17           | H              |                | H              | 130                   |
| 18           | H              |                | H              | 20                    |
| 19           | H              |                | Me             | 20                    |
| 20           | H              |                | H              | 50                    |
| 21           | Me             |                | Me             | 550                   |
| 22           | H              |                | Me             | 100                   |
| 23           | H              |                | H              | 30                    |

Table1 (continued)

| Compound No. | R <sup>1</sup> | R <sup>2</sup> | R <sup>3</sup> | IC <sub>50</sub> (nM) |
|--------------|----------------|----------------|----------------|-----------------------|
|              |                |                |                |                       |
| 24           | H              |                | Me             | 100                   |
| 25           | H              |                | H              | 60                    |
| 26           | Me             |                | Me             | 4                     |
| 27           | Me             |                | Me             | 20                    |
| 28           | Me             |                | Me             | 15                    |
| 29           | Me             |                | --             | 440                   |
| 30           | Me             |                | --             | 180                   |
| 31           | Me             |                | --             | 200                   |
| 32           | Me             |                | --             | 130                   |
| 33           | Me             |                | --             | 30                    |
| 34           | Me             |                | --             | 61                    |
| 35           | Me             |                | --             | 20                    |
| 36           | Me             |                | --             | 30                    |

Table1 (continued)

| Compound No. | R <sup>1</sup> | R <sup>2</sup> | R <sup>3</sup> | IC <sub>50</sub> (nM) |
|--------------|----------------|----------------|----------------|-----------------------|
|              |                |                |                |                       |
| 37           | Me             |                | --             | 21                    |
| 38           | Me             |                | --             | 62                    |
| 39           | Me             |                | --             | 60                    |
| 40           | Me             |                | --             | 70                    |
| 41           | Me             |                | --             | 140                   |
| 42           | Me             |                | --             | 200                   |
| 43           | Me             |                | --             | 250                   |
| 44           | Me             |                | --             | 130                   |
| 45           | Me             |                | --             | 41                    |
| 46           | Me             |                | --             | 32                    |
| 47           | Me             |                | --             | 15                    |
| 48           | Me             |                | --             | 20                    |
| 49           | Me             |                | --             | 52                    |

Table1 (continued)

| Compound No.                                                                      | R <sup>1</sup> | R <sup>2</sup>                                                                      | R <sup>3</sup> | IC <sub>50</sub> (nM) |
|-----------------------------------------------------------------------------------|----------------|-------------------------------------------------------------------------------------|----------------|-----------------------|
| 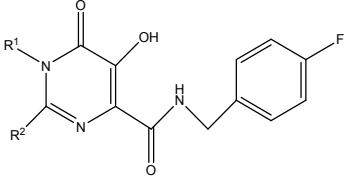 |                |                                                                                     |                |                       |
| <b>50</b>                                                                         | Me             |   | --             | 7                     |
| <b>51</b>                                                                         | Me             |    | --             | 50                    |
| <b>52</b>                                                                         | H              |    | --             | 33                    |
| <b>53</b>                                                                         | Me             |    | --             | 4000                  |
| <b>54</b>                                                                         | Me             |  | --             | 4                     |

Table 2. The compound structures of the test set

| Compound No. | R <sup>1</sup> | R <sup>2</sup> | R <sup>3</sup> | IC <sub>50</sub> (nM) |
|--------------|----------------|----------------|----------------|-----------------------|
|              |                |                |                |                       |
| 71           | H              |                | Me             | 20                    |
| 72           | H              |                | Me             | 250                   |
| 73           | H              |                | H              | 220                   |
| 74           | H              |                | Me             | 14                    |
| 75           | Me             |                | H              | 6                     |
| 76           | Me             |                | --             | 100                   |
| 77           | Me             |                | --             | 100                   |
| 78           | Me             |                | --             | 50                    |
| 79           | Me             |                | --             | 12                    |
| 80           | H              |                | --             | 30                    |

Table 3 The compound structures of the test set

| Compound No. | R <sup>6</sup>                                                                      | IC <sub>50</sub> (nM) |
|--------------|-------------------------------------------------------------------------------------|-----------------------|
|              | 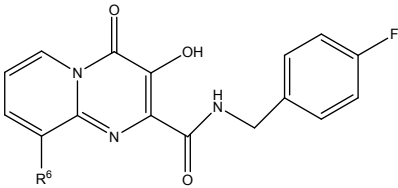   |                       |
| 81           | NHEt                                                                                | 36                    |
| 82           | NHCOPh                                                                              | 18                    |
| 83           |    | 185                   |
| 84           |    | 23                    |
| 85           |   | 36                    |
| 86           |  | 18                    |
| 87           |  | 21                    |
| 88           |  | 21                    |
